# Supplementary material for: Understanding how virtual reality forest experience promote physiological and psychological health for patients undergoing hemodialysis
Source: Front Psychiatry. 2022 Dec 14;13:1007396. doi: 10.3389/fpsyt.2022.1007396 (PMC9794622; doi:10.3389/fpsyt.2022.1007396)
Supplement: Supplementary file 1 [file Data_Sheet_1.xlsx]

## Sheet: 工作表1
	SEXUAL	HR1_1	HR1_2	HR1_3	HR2_1	HR2_2	HR2_3	HR3_1	HR3_2	HR3_3	HF1_1	HF1_2	HF1_3	HF2_1	HF2_2	HF2_3	HF3_1	HF3_2	HF3_3	LF1_1	LF1_2	LF1_3	LF2_1	LF2_2	LF2_3	LF3_1	LF3_2	LF3_3	LFHF1_1	LFHF1_2	LFHF1_3	LFHF2_1	LFHF2_2	LFHF2_3	LFHF3_1	LFHF3_2	LFHF3_3	SDNN1_1	SDNN1_2	SDNN1_3	SDNN2_1	SDNN2_2	SDNN2_3	SDNN3_1	SDNN3_2	SDNN3_3	PL_1	PL_2	PL_3
01E	1	69.04	69.01	66.03	64.22	64.72	64.39	63.88	64.37	64.65	29.94	44.8	44.93	150.91	106.31	118.65	43.47	58.73	34.61	124.96	114.81	86.43	155.08	93.28	177.05	29.58	42.69	49.35	4.17	2.56	1.92	1.03	0.88	1.49	0.68	0.73	1.43	28.51	27.22	31.06	44.67	31.71	44.58	18.51	24.43	28.19	4	4	4
02E	2	67.85	65.53	65.98	63.73	61.42	63.86	66.85	63.41	68.71	24.82	20.86	32.17	118.63	22.33	34.52	29.15	51.36	109.23	70.63	110.13	83.67	158.64	99.67	48.49	68.58	69.79	146.43	2.85	5.28	2.6	1.34	4.46	1.4	2.35	1.36	1.34	26.01	21.98	27.76	30.52	22.67	22.29	22.86	30.28	39.38	4	4	4
03E	1	84.99	81.32	81.39	80.94	80.09	79.99	82.97	81.78	84.81	36.25	41.28	127.37	1.54	1.11	0.89	10.81	1.25	2.25	32.96	74.27	360.84	7.7	9.03	9.31	13.61	5.4	5.94	0.91	1.8	2.83	5	8.14	10.46	1.26	4.32	2.64	14.35	19.25	33.5	7.01	8.57	6.82	10.81	7.02	10.36	4	4	3
04E	2	69.81	69.81	67.07	69.69	67.67	68.8	66.03	65.5	65.27	168.42	210.21	316.02	63.39	87.61	92.94	11.5	9.11	53.55	238.38	359.59	620.25	44.87	31.51	48.94	16.24	7.73	37.85	1.42	1.71	1.96	0.71	0.36	0.53	1.41	0.85	0.71	43.78	49.13	60.85	77.33	45.61	35.83	13.44	10.11	14.66	4	5	4
05E	2	71.2	74.63	70.39	71.41	72.25	72.03	82.87	84.23	85.66	46.37	48.52	88.01	70.4	63.53	49.01	38.69	26.54	30.03	93.75	43.83	100.31	59.44	57.82	43.38	126.96	92	107.14	2.02	0.9	1.14	0.84	0.91	0.89	3.28	3.47	3.57	28.24	37.55	37.76	23.09	28.23	24.78	32.81	22.39	25.29	4	4	3
06E	2	62.49	66.18	69.57	64.66	63.92	61.42				15.14	7.17	6.49	53.68	12.76	9.58				43.59	14.26	26.76	99.98	17.78	9.54				2.88	1.99	4.12	1.86	1.39	1				25.92	12.05	25.07	26.34	17.78	10.9				3	2	3
07E	2	61.96	60.07	60.97	65.74	65.02	65.31	60.13	59.63	59.73	121.94	83.96	21.81	94.05	136.48	103.98	284.36	300.68	302.82	156.73	108.2	22.51	233.94	121.36	109.02	344.51	221.76	235.83	1.29	1.29	1.03	2.49	0.89	1.05	1.21	0.74	0.78	31.23	24.36	15.69	35.85	32.07	29.93	43.91	43.33	47.53	3	2	3
08E	2							72.77	72.58	73.49							7.21	49.16	45.97							11.57	53.37	37.42							1.6	1.09	0.81							14.37	21.78	21.17	4	3	3
09E	2	70.01	69.66	68.21	63.94	64.44	65.66	67.25	66.6	66.44	43.43	46.8	73.56	70.68	72.81	73.03	211.42	362.25	337.67	113.33	132.75	70.21	84.91	73.22	88.25	174.56	78.27	68.61	2.61	2.84	0.95	1.2	1.01	1.21	0.83	0.22	0.2	30.42	28.91	26.94	23.99	22.43	25.03	36.19	33.75	31.64	4	2	3
10E	1	88.94	87.06	88.91	94.31	92.32	90.34	85.29	83.89	84.36	23.81	41.17	36.04	22.52	21.24	47.72	4.56	3.91	2.07	69.68	70.03	63.04	47.03	54.17	37.29	10.74	5.48	6.36	2.93	1.7	1.75	2.09	2.55	0.78	2.36	1.4	3.07	21.75	23.03	19.46	17.87	23.63	21.69	17.19	7.81	8.68	4	2	3
11E	1	63.87	65.11	62.62	64.62	63.61	64.61	72.86	70.84	71.14	465.21	480.95	528.13	409.97	1007.52	1174.47	17.16	28.89	28.79	454.02	309.65	1191.15	234	292.47	355.67	41.03	38.72	41	0.98	0.64	2.26	0.57	0.29	0.3	2.39	1.34	1.42	52.05	49.42	73.01	49.1	65.37	84.8	16.76	19.11	19.08	4	4	3
12E	1	59.98	58.42	61.34	56.46	59.68	61.37	63.54	64.1	66.02	8.26	9.42	10.58	101.17	88.23	274.79	637.4	486.68	151.3	38.58	32.78	46.57	77.79	62.18	150.64	502.62	214.21	182.85	4.67	3.48	4.4	0.77	0.7	0.55	0.79	0.44	1.21	20.55	13.89	18.61	22.94	21.22	34.32	61.04	48.68	40.21	5	2	4
13E	2	87.62	85.8	81.09	83.02	85.37	81.51	88.2	85.31	82.65	186.71	146.01	207.88	63.9	35.85	150.19	646.61	592.59	667.64	60.56	82.49	107.36	39.04	25.36	125.83	943.2	393.22	475.58	0.32	0.56	0.52	0.61	0.71	0.84	1.46	0.66	0.71	24.32	23.29	30.16	19.84	15.78	30.99	70.45	51.18	55.61	4	3	4
14E	1	65.14	62.85	61.47	67.14	60.36	62.54				47.68	47.68	35.71	14.94	26.26	10.09				44.04	42.83	34.45	6.29	12.74	14.87				0.92	0.9	0.96	0.42	0.49	1.47				21.57	19.08	19.99	10.67	15.88	13.86				3	3	3
15E	1	75.96	73.58	74.31	76.58	76.44	77.72	73.91	71.95	73.22	202.09	276.41	319.07	94.05	136.48	103.98	62.02	28.1	52.79	434.59	437.95	522.86	233.94	121.36	109.02	80.89	76.61	128.47	2.15	1.58	1.64	2.49	0.89	1.05	1.3	2.73	2.43	54.27	72.13	62.5	35.85	32.07	29.93	22.79	23.98	18.87	4	3	3
16E	2	57.97	55.93	56.13	51.77	52.25	52.67				237.53	68.49	71.47	351.79	179.32	248.7				186.58	87.47	75.69	242.8	92.08	119.56				0.79	1.28	1.06	0.69	0.51	0.48				36.88	30.44	27	43.84	33.58	35				4	2	3
17E	2							78.69	78.52	79.56							100.51	82.97	154							79.64	45.73	89.66							0.79	0.55	0.58							24.86	25.12	30.33	4	3	3
18E	2	71.42	71.89	70.85	69.58	70.85	70.38	71.92	73.57	71.26	54.23	52.12	76.3	221.14	76.79	47.7	79.04	71.69	55.67	15.77	14.61	33.93	63.84	51.79	11.42	7.07	15.21	4.73	0.29	0.28	0.44	0.29	0.67	0.24	0.09	0.21	0.08	17.85	14.48	18	26.88	20	13.67	16.4	16.77	12.8	4	3	3
19E	1	102.82	103	103.15	101.85	103.68	101.89	104.09	103.38	102.04	5.85	16.99	21.3	43.85	52.62	48.87	16.94	16.29	10.05	11.18	63.07	77.22	172.37	111.93	93.68	17.77	15.5	17.71	1.91	3.71	3.63	3.93	2.13	1.92	1.05	0.95	1.76	9.38	16.48	16.89	25.93	20.37	22.11	9.21	8.7	9.5	4	5	3
20E	2	62.44	62.52	62.93				67.99	66.65	65.57	57.34	24.3	33.3				37.35	72.05	259.18	27.85	18.3	37.27				99.16	92.18	385.29	0.49	0.75	1.12				2.65	1.28	1.49	20.79	17.54	24.37				33.1	29.76	51.14	4	4	3
21E	1	78.91	80.08	77.76	75.61	75.48	74.57	76.82	76.05	75.3	44.14	86.48	36.05	22.02	28.39	15.51	71.51	88.7	57.91	20.73	71.81	25.83	36.86	30.14	38.13	48.56	65.88	44.39	0.47	0.83	0.72	1.67	1.06	2.46	0.68	0.74	0.77	16.31	21.86	17.45	14.62	19.19	21.33	19.29	21.98	21.92	4	4	3
22E	2	65.26	65.07	65.2	64.13	63.19	63.32	66.89	66.03	67.47	69.63	35.45	30.92	127.38	118.19	118.43	115.42	51.96	112.18	33.09	19	9.96	63.01	39.65	72.08	36.24	2.83	174.95	0.48	0.54	0.32	0.49	0.34	0.61	0.31	0.05	1.56	15.71	31.45	12	22	21.19	19.93	19.62	10.63	27.41	3	4	3
23E	1	56.99	55.81	55.43	57.68	57.1	57.87	59.43	58.78	59.13	170.92	172.57	173.84	167.83	98.89	74.92	218.32	110.54	142.54	80.58	86.62	92.61	159.43	122.94	69.17	192.88	242.03	316.14	0.47	0.5	0.53	0.95	1.24	0.92	0.88	2.19	2.22	27.92	26.24	30.97	39.18	26.23	27.77	49.22	34.47	37.86	4	5	4
24E	2	90.3	90.93	89.41	84.35	89.96	92.11	97.39	94.63	93.86	35.03	74.49	23.73	239.77	207.49	88.74	28.96	34.36	50.1	67.03	116.43	40.94	162.79	199.41	82.05	42.79	201.95	175.76	1.91	1.56	1.73	0.68	0.96	0.92	1.48	5.88	3.51	16.68	22.28	13.75	37.35	43.85	31.69	19.62	10.63	27.41	4	4	3
25E	1	87.79	86.31	86.1	79.18	80.09	77.45	73.05	75.65	74.91	36.4	49.91	20.22	76.87	182.19	50.99	142.47	384.06	212.32	67.57	64.62	54.11	148.42	121.94	129.65	166.33	120.98	197.17	1.86	1.29	2.68	1.93	0.67	2.54	1.17	0.32	0.93	19.19	18.68	18.2	27.82	60.67	37.18	33.36	54.55	45.87	3	3	3
26E	2	57.95	58.59	56.9	57.11	58.39	56.15	54.65	54.89	55.03	158.62	205.34	261.53	119.25	89.53	249.03	333.38	358.33	700.42	555	209.46	580.96	141.03	95.02	519.87	464.1	301.26	552.05	3.5	1.02	2.22	1.18	1.06	2.09	1.39	0.84	0.36	72.01	42.94	71.75	31.61	33.79	54.92	56.33	49.36	110.81	4	3	3
[truncated: 6 more columns]
